# Supplementary material
Source: PubMed Central journal article supplement (PMC5710446)

## Supplementary Online Content

Fonarow GC, Keech AC, Pedersen TR. Cost-effectiveness of evolocumab therapy for reducing cardiovascular events in patients with atherosclerotic cardiovascular disease. *JAMA Cardiol*. Published online August 23, 2017. doi:10.1001/jamacardio.2017.2762

**eTable 1.** Population Event Rates per 100 Patients from US Clinical Practice Population (Standard Background Therapy vs. Evolocumab plus Standard Background Therapy)

**eTable 2.** Population Event Rates per 100 Patients from FOURIER Trial Population (Standard Background Therapy vs. Evolocumab plus Standard Background Therapy)

**eTable 3.** Derivation of Model Inputs for Cardiovascular Death

**eTable 4.** Impact Inventory for Cost-effectiveness Analysis

**eTable 5.** Reporting Checklist for Cost-effectiveness Analysis

**eTable 6.** Derivation of Incremental Costs, Life-Years, and QALY Gained using the Base-Model Assumptions

eFigure 1. Markov Cohort-State Transition Model Diagram

**eFigure 2.** Markov Cohort-State Transition Model Diagram Tornado Diagram Based on Deterministic Sensitivity Analyses.

**eFigure 3.** Value-Based Price Probabilistic Sensitivity Analysis (Mean and 95% Credible Intervals)

This supplementary material has been provided by the authors to give readers additional information about their work.

**eTable 1. Population Event Rates per 100 Patients from US Clinical Practice Population (Standard Background Therapy vs. Evolocumab plus Standard Background Therapy)**

|                                | <b>Evolocumab + SBT</b> | <b>SBT</b> |
|--------------------------------|-------------------------|------------|
| <b>10-year Horizon</b>         |                         |            |
| Rate of Non-fatal MI           | 18                      | 29         |
| Rate of Non-fatal IS           | 18                      | 26         |
| Rate of CV death               | 23                      | 25         |
| Rate of revascularization      | 27                      | 38         |
| Rate of MI, IS or CV death     | 58                      | 79         |
| Risk of MI, IS or CV death (%) | 44                      | 55         |
| <b>Lifetime Horizon</b>        |                         |            |
| Rate of Non-fatal MI           | 41                      | 65         |
| Rate of Non-fatal IS           | 43                      | 58         |
| Rate of CV death               | 51                      | 56         |
| Rate of revascularization      | 58                      | 79         |
| Rate of MI, IS or CV death     | 135                     | 179        |
| Risk of MI, IS or CV death (%) | 74                      | 83         |

Abbreviations: CV, cardiovascular; IS, ischemic stroke; MI, myocardial infarction; SBT, standard background therapy. Rate represents event rates per 100 patients and can exceed 100 as patients may experience multiple events over a lifetime. The risk represents the % of patients experiencing one or more events over 10-years or lifetime.

**eTable 2. Population Event Rates per 100 Patients from FOURIER Trial Population (Standard Background Therapy vs. Evolocumab plus Standard Background Therapy)**

|                                | <b>Evolocumab + SBT</b> | <b>SBT</b> |
|--------------------------------|-------------------------|------------|
| <b>10-year Horizon</b>         |                         |            |
| Rate of Non-fatal MI           | 10                      | 16         |
| Rate of Non-fatal IS           | 10                      | 14         |
| Rate of CV death               | 13                      | 14         |
| Rate of revascularization      | 28                      | 40         |
| Rate of MI, IS or CV death     | 33                      | 45         |
| Risk of MI, IS or CV death (%) | 28                      | 36         |
| <b>Lifetime Horizon</b>        |                         |            |
| Rate of Non-fatal MI           | 30                      | 47         |
| Rate of Non-fatal IS           | 31                      | 42         |
| Rate of CV death               | 36                      | 40         |
| Rate of revascularization      | 78                      | 105        |
| Rate of MI, IS or CV death     | 97                      | 129        |
| Risk of MI, IS or CV death (%) | 62                      | 72         |

Abbreviations: CV, cardiovascular; IS, ischemic stroke; MI, myocardial infarction; SBT, standard background therapy. Rate represents event rates per 100 patients and can exceed 100 as patients may experience multiple events over a lifetime. The risk represents the % of patients experiencing one or more events over 10-years or lifetime.

### eTable 3. Derivation of Model Inputs for Cardiovascular Death

Given that the median follow-up of FOURIER was only 26 months and cost-effectiveness modeling requires a lifetime horizon, the assumptions regarding timing and magnitude of cardiovascular mortality effects are critical.

Current evidence supports that treatment with statins, ezetimibe, and PCSK9 inhibitors yield risk reductions that are proportional to the LDL-cholesterol reductions achieved and sustained over time, as these therapies each increase upregulation of the LDL-receptor. A recent analysis of 49 lipid-lowering clinical trials demonstrated that the clinical benefits of the aforementioned classes were proportional to the absolute reduction in LDL-cholesterol.<sup>1</sup> Further support comes from multiple Mendelian randomization studies showing that per unit lower of LDL-cholesterol mediated by variants in HMGCR, NPC1L1, and PCSK9, there were virtually identical lower odds of cardiovascular events.<sup>2</sup> Importantly, this relationship also held true for coronary heart deaths.<sup>2</sup> Thus, for estimating the effects on cardiovascular mortality beyond the period of follow-up in FOURIER, the CTTC meta-analysis<sup>3</sup> was leveraged for estimating the magnitude of cardiovascular mortality reduction in the base case and sensitivity analyses described below, with a 5-year delay before the emergence of cardiovascular mortality reduction was assumed in the base case.

| Risk reduction in CV mortality per 1mmol/L LDL-C reduction | Description                                                                                                                                       | Calculation                                                                                                                                           |
|------------------------------------------------------------|---------------------------------------------------------------------------------------------------------------------------------------------------|-------------------------------------------------------------------------------------------------------------------------------------------------------|
| Base case: 9.5%                                            | Data derived from the ratio of CVD/CHD in the CTTC meta-analysis, CHD in the more vs less statin trials, and reduction in CHD, MI and stroke from | $(RRR\_CTTC\_CVD/RR\_CTTC\_CHD)*RRR\_MorevsLess\_CHD*(RRR\_FOURIER\_CHD,MI,S/RR\_CTTC\_Major\ vascular\ event)=$ $(14\%/20\%)*15\%*(20\%/22\%)=9.5\%$ |

|                                |                                                                                                                                                                                                                |                                                                                                                                                                  |
|--------------------------------|----------------------------------------------------------------------------------------------------------------------------------------------------------------------------------------------------------------|------------------------------------------------------------------------------------------------------------------------------------------------------------------|
|                                | FOURIE R relative to that in the overall CTTC to derive the anticipated treatment effect on CV mortality                                                                                                       |                                                                                                                                                                  |
| Sensitivity analysis:<br>6.4%  | Data derived similar to the base case, but apply the reduction in major vascular event from FOURIE R relative to that in more vs less statin trials to derive the anticipated treatment effect on CV mortality | $(RRR\_CTTC\_CVD/RR\_CTTC\_CHD)*RRR\_MorevsLess\_CHD*(RRR\_FOURIE\_Major\ vascular\ event/RRR\_CTTC\_Major\ vascular\ event)=(14\%/20\%)*15\%*(17\%/28\%)=6.4\%$ |
| Sensitivity analysis:<br>14.0% | Data derived directly from the CV mortality reduction in overall CTTC. FOURIE                                                                                                                                  | RRR_CTTC_CVD=14.0%                                                                                                                                               |

|                                                                  |                                                                                                                                                                                                                                                      |                                                                     |
|------------------------------------------------------------------|------------------------------------------------------------------------------------------------------------------------------------------------------------------------------------------------------------------------------------------------------|---------------------------------------------------------------------|
|                                                                  | R results are largely consistent with CTTC. The treatment benefit in CV mortality is expected to follow what was observed in CTTC                                                                                                                    |                                                                     |
| Scenario analysis: key composite secondary endpoint from FOURIER | Data derived from the FOURIER key composite secondary endpoint (time to MI/stroke/CV death) for the treatment effect on MI, stroke, and CV death, with this composite risk reduction applied to each individual endpoint from the start of treatment | RRR_FOURIER_Key secondary endpoint (year 1 / beyond 1 year)=12%/19% |
| Scenario                                                         | Data                                                                                                                                                                                                                                                 | RRR_FOURIER_Key secondary endpoint (year 1 / beyond 1               |

|                                                                                                                               |                                                                                                                                                                                                                                                                                                                                                                                                                      |               |
|-------------------------------------------------------------------------------------------------------------------------------|----------------------------------------------------------------------------------------------------------------------------------------------------------------------------------------------------------------------------------------------------------------------------------------------------------------------------------------------------------------------------------------------------------------------|---------------|
| io<br>analysi<br>s: key<br>compo<br>site<br>secon<br>dary<br>endpoi<br>nt in<br>the US<br>subgro<br>up<br>from<br>FOURI<br>ER | derived<br>from the<br>FOURIE<br>R key<br>composit<br>e<br>seconda<br>ry<br>endpoint<br>(time to<br>MI/strok<br>e/CV<br>death)<br>for the<br>treatmen<br>t effect<br>on MI,<br>stroke,<br>and CV<br>death<br>obtained<br>only<br>from the<br>US<br>subgrou<br>p<br>enrolled<br>in the<br>FOURIE<br>R trial<br>(n=4013<br>) applied<br>to each<br>individua<br>l<br>endpoint<br>from the<br>start of<br>treatmen<br>t | year)=26%/27% |
|-------------------------------------------------------------------------------------------------------------------------------|----------------------------------------------------------------------------------------------------------------------------------------------------------------------------------------------------------------------------------------------------------------------------------------------------------------------------------------------------------------------------------------------------------------------|---------------|

Abbreviations: CHD, coronary heart disease; CTTC, Cholesterol Treatment Trialists' Collaboration; CV, cardiovascular; CVD, cardiovascular disease; LDL-C, low-density lipoprotein-cholesterol; MI, myocardial infarction, RRR relative rate ratios.

**References**

1. Silverman MG, Ference BA, Im K, et al. Association between lowering LDL-C and cardiovascular risk reduction among different therapeutic interventions: a systematic review and meta-analysis. *JAMA*. 2016;316(12):1289-1297.
2. Ference BA, Robinson JG, Brook RD, et al. Variation in PCSK9 and HMGCR and risk of cardiovascular disease and diabetes. *N Engl J Med*. 2016;375(22):2144-2153.
3. Cholesterol Treatment Trialists Collaboration, Baigent C, Blackwell L, et al. Efficacy and safety of more intensive lowering of LDL cholesterol: a meta-analysis of data from 170,000 participants in 26 randomised trials. *Lancet*. 2010;376(9753):1670-1681.





**eTable 4. Impact Inventory for Cost-effectiveness Analysis**

| Sector                                                           | Type of Impact<br>(list category within each sector with unit of measure if relevant) <sup>a</sup> | Included in This Reference Case Analysis From Societal Perspective? |                          | Notes on Sources of Evidence            |
|------------------------------------------------------------------|----------------------------------------------------------------------------------------------------|---------------------------------------------------------------------|--------------------------|-----------------------------------------|
|                                                                  |                                                                                                    | Health Care sector                                                  | Societal                 |                                         |
| <b>Formal Health Care Sector</b>                                 |                                                                                                    |                                                                     |                          |                                         |
| Health                                                           | Health outcomes (effects)                                                                          |                                                                     |                          |                                         |
|                                                                  | Longevity effects                                                                                  | <input type="checkbox"/>                                            | X                        | FOURIER, <sup>1</sup> CTTC <sup>2</sup> |
|                                                                  | Health-related quality-of-life effects                                                             | <input type="checkbox"/>                                            | X                        | Time trade-off study <sup>3</sup>       |
|                                                                  | Other health effects (eg, adverse events and secondary transmissions of infections)                | <input type="checkbox"/>                                            | X                        | FOURIER <sup>1</sup>                    |
|                                                                  | Medical costs                                                                                      |                                                                     |                          |                                         |
|                                                                  | Paid for by third-party payers                                                                     | <input type="checkbox"/>                                            | X                        | WAC and Credit Suisse <sup>4</sup>      |
|                                                                  | Paid for by patients out-of-pocket                                                                 | <input type="checkbox"/>                                            | <input type="checkbox"/> |                                         |
|                                                                  | Future related medical costs (payers and patients)                                                 | <input type="checkbox"/>                                            | X                        |                                         |
|                                                                  | Future unrelated medical costs (payers and patients)                                               | <input type="checkbox"/>                                            | <input type="checkbox"/> |                                         |
| <b>Informal Health Care Sector</b>                               |                                                                                                    |                                                                     |                          |                                         |
| Health                                                           | Patient-time costs                                                                                 | NA                                                                  | X                        | AHA/ASA CVD burden report <sup>5</sup>  |
|                                                                  | Unpaid caregiver-time costs                                                                        | NA                                                                  | X                        | AHA/ASA CVD burden report <sup>5</sup>  |
|                                                                  | Transportation costs                                                                               | NA                                                                  | <input type="checkbox"/> |                                         |
| <b>Non-Health Care Sectors (with examples of possible items)</b> |                                                                                                    |                                                                     |                          |                                         |
| Productivity                                                     | Labor market earnings lost                                                                         | NA                                                                  | X                        | AHA/ASA CVD burden report <sup>5</sup>  |
|                                                                  | Cost of unpaid lost productivity due to illness                                                    | NA                                                                  | X                        | AHA/ASA CVD burden report <sup>5</sup>  |
|                                                                  | Cost of uncompensated household production <sup>b</sup>                                            | NA                                                                  | X                        | AHA/ASA CVD burden report <sup>5</sup>  |
| Consumption                                                      | Future consumption unrelated to health                                                             | NA                                                                  | <input type="checkbox"/> |                                         |
| Social Services                                                  | Cost of social services as part of intervention                                                    | NA                                                                  | <input type="checkbox"/> |                                         |
| Legal or Criminal Justice                                        | Number of crimes related to intervention                                                           | NA                                                                  | <input type="checkbox"/> |                                         |
|                                                                  | Cost of crimes related to intervention                                                             | NA                                                                  | <input type="checkbox"/> |                                         |
| Education                                                        | Impact of intervention on educational achievement of population                                    | NA                                                                  | <input type="checkbox"/> |                                         |
| Housing                                                          | Cost of intervention on home improvements (eg, removing lead paint)                                | NA                                                                  | <input type="checkbox"/> |                                         |
| Environment                                                      | Production of toxic waste                                                                          | NA                                                                  | <input type="checkbox"/> |                                         |

|                 |                           |    |                          |  |
|-----------------|---------------------------|----|--------------------------|--|
|                 | pollution by intervention |    |                          |  |
| Other (specify) | Other impacts             | NA | <input type="checkbox"/> |  |

<sup>a</sup>Categories listed are intended as examples for analysts. <sup>b</sup>Examples include activities such as food preparation, cooking, and clean up in the household; household management; shopping; obtaining services; and travel related to household activity.<sup>6</sup>  
Abbreviations: NA, not applicable; WAC, wholesale acquisition cost

### References

1. Sabatine MS, Giugliano RP, Keech AC, et al. Evolocumab and clinical outcomes in patients with cardiovascular disease. *N Engl J Med*. 2017;376(18):1713-1722. DOI: 1710.1056/NEJMoa1615664.
2. Cholesterol Treatment Trialists Collaboration, Baigent C, Blackwell L, et al. Efficacy and safety of more intensive lowering of LDL cholesterol: a meta-analysis of data from 170,000 participants in 26 randomised trials. *Lancet*. 2010;376(9753):1670-1681.
3. Matza LS, Stewart KD, Gandra SR, et al. Acute and chronic impact of cardiovascular events on health state utilities. *BMC Health Serv Res*. 2015;15:173.
4. Credit Suisse. Global equity research major pharmaceuticals - Global pharma. 2015.
5. American Heart Association. Cardiovascular disease: a costly burden for America. Projections through 2035. [http://www.heart.org/idc/groups/heart-public/@wcm/@adv/documents/downloadable/ucm\\_491543.pdf](http://www.heart.org/idc/groups/heart-public/@wcm/@adv/documents/downloadable/ucm_491543.pdf). Accessed May 5, 2017.
6. Grosse SD, Krueger KV, Mvundura M. Economic productivity by age and sex: 2007 estimates for the United States. *Med Care*. 2009;47:S94-103.

**eTable 5. Reporting Checklist for Cost-effectiveness Analysis**

| Element                                                                                                                                                                                                                                                                                                                                                                    | Journal Article                    | Technical Appendix     |
|----------------------------------------------------------------------------------------------------------------------------------------------------------------------------------------------------------------------------------------------------------------------------------------------------------------------------------------------------------------------------|------------------------------------|------------------------|
| <b>Introduction</b>                                                                                                                                                                                                                                                                                                                                                        |                                    |                        |
| Background of the problem                                                                                                                                                                                                                                                                                                                                                  | Yes                                |                        |
| <b>Study Design and Scope</b>                                                                                                                                                                                                                                                                                                                                              |                                    |                        |
| Objectives                                                                                                                                                                                                                                                                                                                                                                 | Yes                                |                        |
| Audience                                                                                                                                                                                                                                                                                                                                                                   | Yes                                |                        |
| Type of analysis                                                                                                                                                                                                                                                                                                                                                           | Yes                                |                        |
| Target populations                                                                                                                                                                                                                                                                                                                                                         | Yes                                | Yes                    |
| Description of interventions and comparators (including no intervention, if applicable)                                                                                                                                                                                                                                                                                    | Yes                                | Yes                    |
| Other intervention descriptors (eg, care setting, model of delivery, intensity and timing of intervention)                                                                                                                                                                                                                                                                 | Yes                                |                        |
| Boundaries of the analysis; defining the scope or comprehensiveness of the study (eg, for a screening program, whether only a subset of many possible strategies are included; for a transmissible condition, the extent to which disease transmission is captured; for interventions with many possible delivery settings, whether only one or more settings are modeled) | Yes                                |                        |
| Time horizon                                                                                                                                                                                                                                                                                                                                                               | Yes                                |                        |
| Analytic perspectives (eg, reference case perspectives [health care sector, societal]; other perspectives such as employer or payer)                                                                                                                                                                                                                                       | Yes                                |                        |
| Whether this analysis meets the requirements of the reference case                                                                                                                                                                                                                                                                                                         | Yes                                |                        |
| Analysis plan                                                                                                                                                                                                                                                                                                                                                              |                                    | Available upon request |
| <b>Methods and Data</b>                                                                                                                                                                                                                                                                                                                                                    |                                    |                        |
| Trial-based analysis or model-based analysis. If model-based:                                                                                                                                                                                                                                                                                                              |                                    |                        |
| Description of event pathway or model (describe condition or disease and the health states included)                                                                                                                                                                                                                                                                       | Yes                                |                        |
| Diagram of event pathway or model (depicting the sequencing and possible transitions among the health states included)                                                                                                                                                                                                                                                     | Yes                                |                        |
| Description of model used (eg, decision tree, state transition, microsimulation)                                                                                                                                                                                                                                                                                           | Yes                                |                        |
| Modeling assumptions                                                                                                                                                                                                                                                                                                                                                       | Yes                                |                        |
| Software used                                                                                                                                                                                                                                                                                                                                                              | Yes                                |                        |
| Identification of key outcomes                                                                                                                                                                                                                                                                                                                                             | Yes                                |                        |
| Complete information on sources of effectiveness data, cost data, and preference weights                                                                                                                                                                                                                                                                                   | Yes                                |                        |
| Methods for obtaining estimates of effectiveness (including approaches used for evidence synthesis)                                                                                                                                                                                                                                                                        | Yes                                | Yes                    |
| Methods for obtaining estimates of costs and preference weights                                                                                                                                                                                                                                                                                                            | No (referenced prior publications) |                        |
| Critique of data quality                                                                                                                                                                                                                                                                                                                                                   | Yes                                |                        |
| Statement of costing year (ie, the year to which all costs have been adjusted for the analysis; eg, 2016)                                                                                                                                                                                                                                                                  | 2017                               |                        |
| Statement of method used to adjust costs for inflation                                                                                                                                                                                                                                                                                                                     | Yes                                |                        |

|                                                                                                                                                                                          |     |     |
|------------------------------------------------------------------------------------------------------------------------------------------------------------------------------------------|-----|-----|
| Statement of type of currency                                                                                                                                                            | Yes |     |
| Source and methods for obtaining expert judgment if applicable                                                                                                                           |     | Yes |
| Statement of discount rates                                                                                                                                                              | Yes |     |
| <b>Impact Inventory</b>                                                                                                                                                                  |     |     |
| Full accounting of consequences within and outside the health care sector                                                                                                                | Yes |     |
| <b>Results</b>                                                                                                                                                                           |     |     |
| Results of model validation                                                                                                                                                              | Yes | Yes |
| Reference case results (discounted and undiscounted): total costs and effectiveness, incremental costs and effectiveness, incremental cost-effectiveness ratios, measures of uncertainty | Yes |     |
| Disaggregated results for important categories of costs, outcomes, or both                                                                                                               |     | Yes |
| Results of sensitivity analysis                                                                                                                                                          | Yes |     |
| Other estimates of uncertainty                                                                                                                                                           | Yes | Yes |
| Graphical representation of cost-effectiveness results                                                                                                                                   | Yes |     |
| Graphical representation of uncertainty analyses                                                                                                                                         | Yes | Yes |
| Aggregate cost and effectiveness information                                                                                                                                             | Yes |     |
| Secondary analyses                                                                                                                                                                       | Yes |     |
| <b>Disclosures</b>                                                                                                                                                                       |     |     |
| Statement of any potential conflicts of interest due to funding source, collaborations, or outside interests                                                                             | Yes |     |
| <b>Discussion</b>                                                                                                                                                                        |     |     |
| Summary of reference case results                                                                                                                                                        | Yes |     |
| Summary of sensitivity of results to assumptions and uncertainties in the analysis                                                                                                       | Yes |     |
| Discussion of the study results in the context of results of related cost-effective analyses                                                                                             | Yes |     |
| Discussion of ethical implications (eg, distributive implications relating to age, disability, or other characteristics of the population)                                               | Yes |     |
| Limitations of the study                                                                                                                                                                 | Yes |     |
| Relevance of study results to specific policy questions or decisions                                                                                                                     | Yes |     |

**eTable 6. Derivation of Incremental Costs, Life-Years, and QALY Gained using the Base-Model Assumptions<sup>a</sup>**

| Components      | Cost, \$                                     |                                       |                | Life-Years                                   |                                       |              | QALY                                         |                                       |              |
|-----------------|----------------------------------------------|---------------------------------------|----------------|----------------------------------------------|---------------------------------------|--------------|----------------------------------------------|---------------------------------------|--------------|
|                 | Evolocumab + Standard Background and Therapy | Standard Background and Therapy Alone | Incremental    | Evolocumab + Standard Background and Therapy | Standard Background and Therapy Alone | Difference   | Evolocumab + Standard Background and Therapy | Standard Background and Therapy Alone | Difference   |
| Medication      | 142,195                                      | 2,820                                 | <b>139,375</b> |                                              |                                       |              |                                              |                                       |              |
| Non-fatal MI    | 30,766                                       | 49,663                                | <b>-18,897</b> | 0.28                                         | 0.45                                  | <b>-0.17</b> | 0.19                                         | 0.30                                  | <b>-0.12</b> |
| Non-fatal IS    | 24,491                                       | 33,597                                | <b>-9,106</b>  | 0.29                                         | 0.40                                  | <b>-0.11</b> | 0.10                                         | 0.13                                  | <b>-0.04</b> |
| Fatal CV events | 26,947                                       | 29,751                                | <b>-2,804</b>  |                                              |                                       |              |                                              |                                       |              |
| RV              | 24,438                                       | 33,468                                | <b>-9,030</b>  |                                              |                                       |              |                                              |                                       |              |
| Post-CV event   | 91,438                                       | 85,578                                | <b>5,860</b>   | 10.59                                        | 9.90                                  | <b>0.69</b>  | 7.34                                         | 6.80                                  | <b>0.54</b>  |
| Total           | 340,275                                      | 234,877                               | <b>105,398</b> | 11.16                                        | 10.75                                 | <b>0.41</b>  | 7.62                                         | 7.23                                  | <b>0.39</b>  |

Abbreviations: QALY, quality-adjusted life-year; MI, myocardial infarction; IS, ischemic stroke; CV, cardiovascular; RV, coronary revascularization.

<sup>a</sup> Analysis uses the base-case inputs in the model, including list price for evolocumab, cost data from US Claims Data, and Utilities as shown in Table 1.

**eFigure 1. Markov Cohort-State Transition Model Diagram**

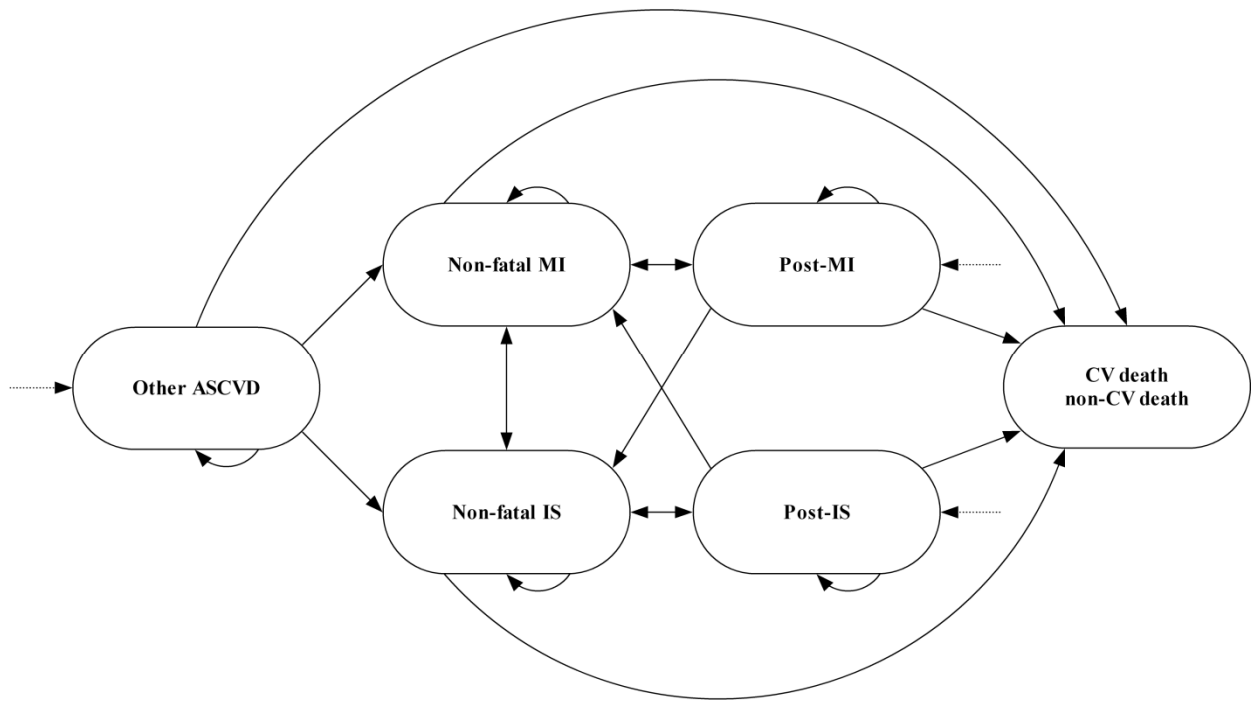

Abbreviations: ASCVD, atherosclerotic cardiovascular disease; CV, cardiovascular; IS, ischemic stroke; MI, myocardial infarction.

## eFigure 2. Markov Cohort-State Transition Model Diagram Tornado Diagram Based on Deterministic Sensitivity Analyses.

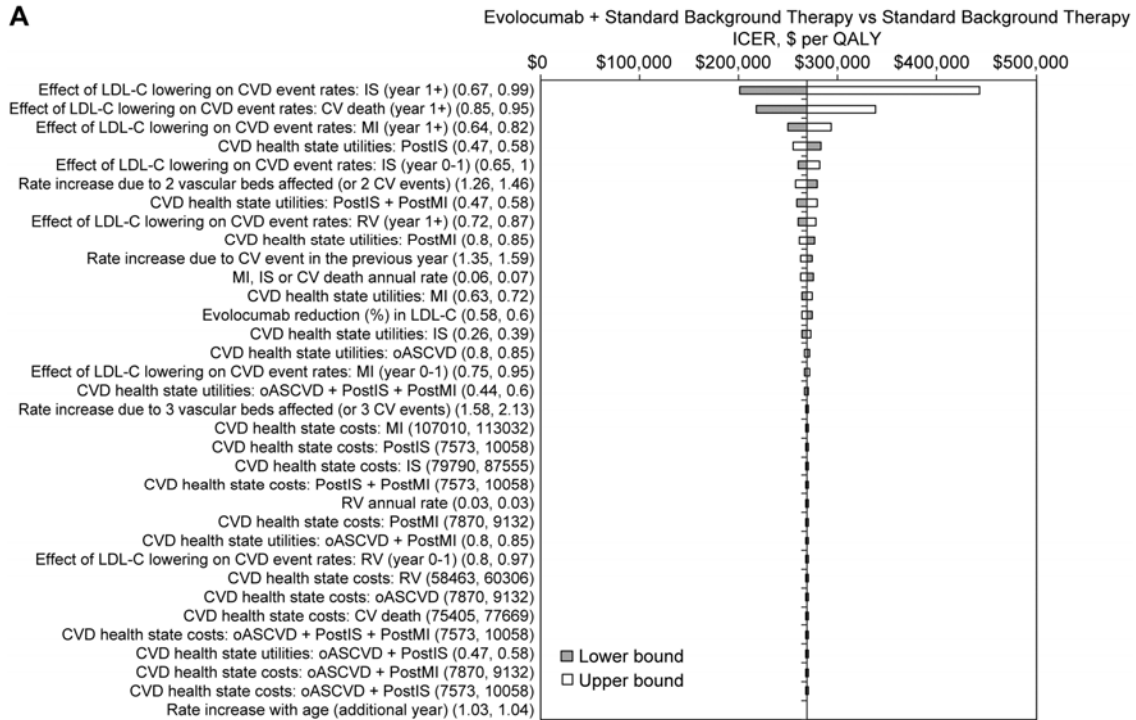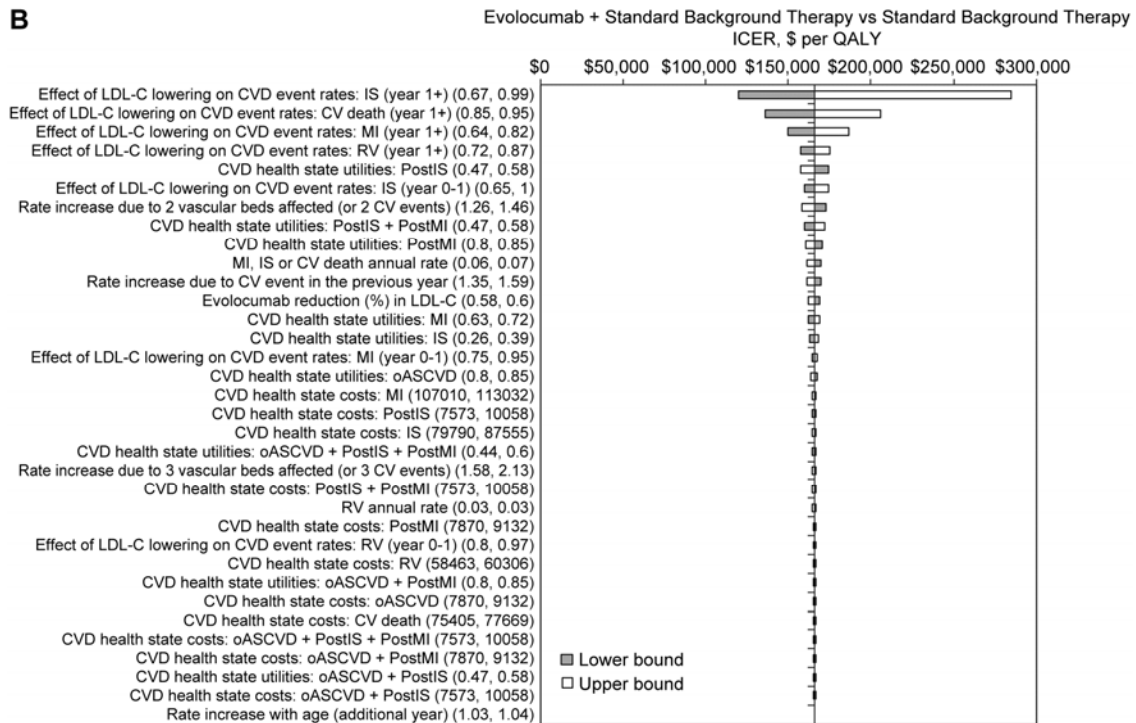

Tornado diagram based on deterministic sensitivity analyses. Panel A shows ICERs at full list price for evolocumab. Panel B show ICERs at net discounted price for evolocumab. Abbreviations: CV, cardiovascular; CVD, cardiovascular disease; MI, myocardial infarction; IS, ischemic stroke; RV, revascularization; LDL-C, low-density lipoprotein-cholesterol.



**eFigure 3. Value-Based Price Probabilistic Sensitivity Analysis (Mean and 95% Credible Intervals)**

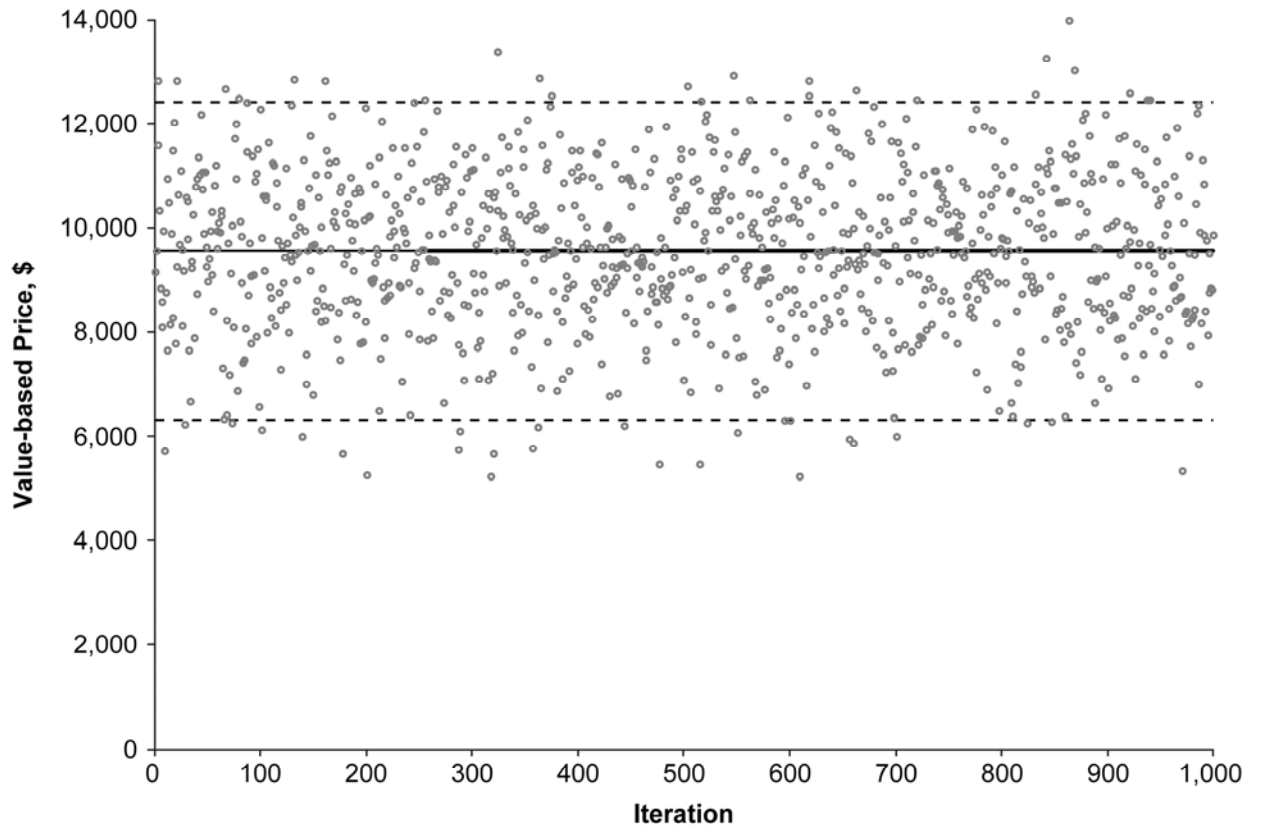

Supplement: jamacardiol-2-1069-s001.pdf [file jamacardiol-2-1069-s001.pdf]
